# Supplementary material for: Development of a novel anti-hepatitis B virus agent via Sp1
Source: PubMed Central journal article supplement (PMC6949255; doi:10.1038/s41598-019-56842-9), 2020-01-08
Supplement: 41598_2019_56842_MOESM1_ESM.pdf [file 41598_2019_56842_MOESM1_ESM.pdf]

## Development of a novel anti-hepatitis B virus agent via Sp1

Michiyo Hayakawa<sup>1</sup>, Hideaki Umeyama<sup>2</sup>, Mitsuo Iwadate<sup>2</sup>, Y-h Taguchi<sup>3</sup>, Yoshihiko Yano<sup>4</sup>, Takashi Honda<sup>5</sup>, Saori Itami-Matsumoto<sup>1</sup>, Ritsuza Kozuka<sup>1</sup>, Masaru Enomoto<sup>1</sup>, Akihiro Tamori<sup>1</sup>, Norifumi Kawada<sup>1</sup>, Yoshiaki Murakami<sup>1</sup>#\*

1. Department of Hepatology, Graduate School of Medicine, Osaka City University, Osaka 545-8585, Japan.
2. Department of Biological Sciences, Chuo University, Tokyo 112-8551, Japan.
3. Department of Physics, Chuo University, Tokyo 112-8551, Japan.
4. Division of Gastroenterology, Department of Internal of Medicine, Kobe University Graduate School of Medicine, Kobe 650-0017, Japan.
5. Division of Gastroenterology, Department of Internal Medicine, Nagoya University Graduate School of Medicine, Nagoya 466-8550, Japan.

\*Corresponding author

Yoshiaki Murakami M.D., Ph.D

#Present affiliation

Department of Molecular Pathology

Tokyo Medical University

6-1-1, Shinjuku, Shinjuku-Ku, Tokyo 160-8402, Japan

Tel +81-3-3351-6141

Fax +81-3-3352-6335

e-mail [yoshikim@tokyo-med.ac.jp](mailto:yoshikim@tokyo-med.ac.jp)

Supplementary information

Supplementary table

Supplementary table 1. Anti-HBV effect for ETV and each alpha-glycosidase inhibitor

Supplementary table 2. List of common genes with expression level that changed with AGI7 and AGI14 treatment and the genes that recognize the promoter region of E2F, E2F2, and Sp1

Supplementary table 3. List of siRNA sequence

Supplementary figure legend

Supplementary figure 1. Estimated joint structure between alpha-glycosidase inhibitor and alpha-glucosidase

- A. Estimated docking structure with Acarbose (AGI1), Miglitol (AGI2), and Voglibose (AGI3), and human alpha-glucosidase.
- B. Estimated docking structure with AGI5, AGI6, AGI7, AGI13, AGI14 and human alpha-glucosidase

Supplementary figure 2. Anti-viral effect for alpha-glycosidase inhibitor for diabetes.

- A. Anti-viral effect for AGI1-AGI3. Vertical and horizontal axis is the amount of HBVDNA (copies/ml) and number of days after infection.
- B. Estimating cell toxicity the day after infection.

Supplementary figure 3. Suppressive effect of novel alpha-glycosidase inhibitor candidate on alpha-glucosidase

Vertical axis is inhibitory effect of alpha-glucosidase (%)

Supplementary figure 4. Anti-viral effect of siRNA for Sp1 and E2F3

Vertical axis is the relative amount of HBVDNA (normalized on negative control). TF is denoted only transfection reagent. Asterisk indicates significant difference ( $p < 0.05$ ).

Each experiment was repeated three times.

Supplementary Table 1. Anti-HBV effect by ETV and each AGI (p-value between arbitrary two groups)

|                     | d12      | d22      | d12      | d22      | d12      | d22      |
|---------------------|----------|----------|----------|----------|----------|----------|
|                     | AGI4     |          | AGI8     |          | AGI13    |          |
| NT vs. ETV          | 1.48E-02 | 1.32E-03 | 1.48E-02 | 1.32E-03 | 4.10E-03 | 1.13E-03 |
| NT vs. 10 $\mu$ M   | 6.66E-01 | 4.13E-01 | 4.76E-01 | 1.03E-01 | 3.37E-03 | 1.74E-03 |
| NT vs. 100 $\mu$ M  | 3.45E-01 | 2.00E-02 | 2.43E-02 | 4.03E-03 | 3.12E-03 | 1.08E-03 |
| ETV vs. 10 $\mu$ M  | 5.72E-04 | 1.70E-04 | 2.03E-02 | 6.01E-04 | 8.44E-01 | 3.55E-03 |
| ETV vs. 100 $\mu$ M | 2.76E-03 | 3.58E-03 | 8.44E-02 | 7.04E-03 | 9.15E-01 | 6.28E-01 |
|                     | AGI5     |          | AGI9     |          | AGI14    |          |
| NT vs. ETV          | 1.48E-02 | 1.32E-03 | 8.72E-03 | 1.64E-03 | 4.10E-03 | 1.13E-03 |
| NT vs. 10 $\mu$ M   | 1.66E-02 | 1.48E-03 | 1.07E-01 | 9.01E-03 | 4.10E-03 | 1.13E-03 |
| NT vs. 100 $\mu$ M  | 2.06E-02 | 1.67E-03 | 7.62E-01 | 4.85E-01 | 3.52E-03 | 8.96E-04 |
| ETV vs. 10 $\mu$ M  | 3.92E-01 | 1.29E-01 | 2.88E-03 | 2.59E-04 | 4.41E-01 | 6.66E-01 |
| ETV vs. 100 $\mu$ M | 3.82E-01 | 4.52E-01 | 2.31E-04 | 6.61E-04 | 5.03E-01 | 3.12E-02 |
|                     | AGI6     |          | AGI11    |          | AGI15    |          |
| NT vs. ETV          | 1.48E-02 | 1.32E-03 | 8.72E-03 | 1.64E-03 | 4.10E-03 | 1.13E-03 |
| NT vs. 10 $\mu$ M   | 1.40E-01 | 3.92E-02 | 4.50E-01 | 7.40E-01 | 6.20E-01 | 4.03E-01 |
| NT vs. 100 $\mu$ M  | 2.50E-02 | 2.01E-03 | 2.11E-02 | 3.92E-03 | 1.37E-02 | 2.49E-03 |
| ETV vs. 1 $\mu$ M   | 2.22E-02 | 2.33E-05 | 3.01E-04 | 1.13E-04 | 4.00E-03 | 2.11E-04 |
| ETV vs. 10 $\mu$ M  | 8.05E-01 | 4.77E-01 | 6.66E-03 | 4.06E-02 | 3.27E-02 | 3.49E-03 |

Abbreviation; Grey shade denoted significant difference between arbitrary two groups (p<0.05).

Supplementary table 2.

List of genes of their expression level was changed commonly with treatment AGI7 and AGI14 and the genes which recognized promoter region of E2F, E2F3, and Sp1

| up regulation |                   |                   |             |                   |                   |
|---------------|-------------------|-------------------|-------------|-------------------|-------------------|
| gene symbol   | E2F<br>(M00803_0) | E2F<br>(M00803_1) | gene symbol | E2F<br>(M00803_0) | E2F<br>(M00803_1) |
| 10-Sep        | *                 | *                 | MIR1914     | *                 | *                 |
| AADACP1       | *                 | *                 | MIR6087     |                   |                   |
| ABCC4         | *                 | *                 | MSC         | *                 | *                 |
| ADAMTSL3      | *                 | *                 | MSH2        | *                 | *                 |
| ADPRM         |                   |                   | MTHFS       | *                 | *                 |
| AIRE          | *                 | *                 | MYLK4       | *                 | *                 |
| ALDH18A1      | *                 | *                 | NAA16       | *                 | *                 |
| ALDH1L2       | *                 | *                 | NAB2        | *                 | *                 |
| ALKBH1        | *                 | *                 | NACC1       | *                 | *                 |
| ANKS4B        |                   |                   | NADSYN1     | *                 |                   |
| ARMCX2        |                   |                   | NALCN       | *                 | *                 |
| ASTE1         | *                 |                   | NBPF3       | *                 | *                 |
| ATIC          | *                 | *                 | NDUFAF2     | *                 | *                 |
| BAZ2A         | *                 | *                 | NEURL1B     | *                 | *                 |
| BMP8B         | *                 | *                 | NICN1       | *                 | *                 |
| BOLA1         | *                 |                   | NME6        | *                 | *                 |
| BRI3BP        | *                 | *                 | NOL6        | *                 | *                 |
| C10orf10      | *                 | *                 | NR0B1       | *                 | *                 |
| C16orf74      | *                 | *                 | NRTN        | *                 | *                 |
| C17orf58      | *                 | *                 | NSDHL       | *                 |                   |
| C1orf167      |                   |                   | NUBPL       | *                 | *                 |
| CANX          | *                 | *                 | NUDT18      | *                 | *                 |
| CAPG          | *                 | *                 | NVL         | *                 | *                 |
| CAV1          | *                 | *                 | OSTC        | *                 | *                 |
| CCDC88B       |                   |                   | PARP11      |                   |                   |
| CD36          |                   |                   | PCYT2       | *                 | *                 |

|           |   |   |           |   |   |
|-----------|---|---|-----------|---|---|
| CDR2      | * | * | PGPEP1    | * | * |
| CFH       |   |   | PIGP      | * | * |
| CHRDL2    | * | * | PLS1      | * | * |
| CKMT2-AS1 | * | * | PMS1      | * | * |
| CLIC6     | * | * | PNRC2     | * | * |
| COX10     | * | * | PODXL     | * | * |
| CSRNP3    |   |   | POLI      | * | * |
| DDX18     | * | * | POLR3F    | * | * |
| DHX29     | * |   | PRDX4     | * | * |
| DNAJC12   | * | * | PRMT9     | * | * |
| DNAJC22   |   |   | PYCRL     | * | * |
| DPY19L1   | * | * | RAC3      | * | * |
| DPY19L2P2 | * | * | RBMXL1    | * | * |
| DPYD      | * | * | RFXANK    | * | * |
| ELK3      | * | * | RIPK3     | * |   |
| EMC3-AS1  |   |   | RLTPR     | * | * |
| ENTPD5    | * | * | RNF13     | * | * |
| EPS15     | * | * | RNLS      | * | * |
| ERCC4     | * | * | RSBN1L    | * | * |
| ERCC6     | * | * | RTN4R     | * | * |
| ESD       | * |   | SERPINA10 |   |   |
| ETV6      | * | * | SHISA4    | * | * |
| FABP5     | * | * | SHPRH     | * | * |
| FAM185A   | * | * | SHROOM3   |   |   |
| FAM46C    | * | * | SIX5      | * | * |
| FBXL14    | * | * | SLA2      | * |   |
| FGF18     | * | * | SLC22A9   |   |   |
| FGFR2     | * | * | SLC35B2   | * | * |
| FGG       |   |   | SLC45A3   | * | * |
| FHOD1     | * | * | SLC6A3    | * | * |
| FIGNL1    | * | * | SMAD5     | * | * |
| FXN       | * | * | SMOX      | * | * |

|              |   |   |              |   |   |
|--------------|---|---|--------------|---|---|
| GALK1        | * | * | SNORA62      |   |   |
| GATA2        | * | * | SPATA18      | * | * |
| GGACT        | * | * | SPG11        | * |   |
| GINS2        | * | * | SSRP1        | * | * |
| GKAP1        | * | * | SULT2A1      | * |   |
| GLIS3-AS1    |   |   | SYTL3        | * | * |
| GPC2         | * |   | TAF1B        | * | * |
| GUCY1A3      | * | * | TBC1D5       | * | * |
| HCFC1        | * | * | TBX19        |   |   |
| HEXA-AS1     | * | * | TDP1         | * | * |
| HNRNPH3      | * | * | TDRD3        | * | * |
| HS3ST2       | * | * | TENM3        | * | * |
| HSD17B1      | * | * | THNSL1       |   |   |
| HSP90B1      | * | * | THNSL2       | * | * |
| IGF1R        | * | * | TMEM154      | * |   |
| IL12A-AS1    |   |   | TMEM260      |   |   |
| IL1RL2       | * | * | TMEM50A      | * | * |
| IL22RA1      | * |   | TRIM8        | * | * |
| INTS6-AS1    | * | * | TSPAN7       | * | * |
| IRF2BPL      | * | * | TSR1         | * | * |
| ITGAV        | * | * | TXNL4B       | * | * |
| KANTR        | * | * | UBR5-AS1     |   |   |
| KBTBD8       | * | * | UFM1         | * | * |
| KCMF1        | * | * | URGCP        | * |   |
| KLF13        |   |   | USH2A        |   |   |
| KNDC1        |   |   | USP10        | * | * |
| LINC00294    |   |   | USP12-AS2    |   |   |
| LINC01485    |   |   | WDR36        |   |   |
| LINC01488    |   |   | YPEL4        | * | * |
| LIPT2        | * |   | ZBED5-AS1    | * | * |
| LOC100270746 |   |   | ZHX1-C8orf76 | * | * |
| LOC100499484 | * | * | ZNF227       | * | * |

| LOC100506022           |                           |                            | ZNF260             | *                         | *                          |
|------------------------|---------------------------|----------------------------|--------------------|---------------------------|----------------------------|
| LOC101928994           | *                         | *                          | ZNF33B             | *                         |                            |
| LTA4H                  | *                         |                            | ZNF441             | *                         |                            |
| LUZP1                  | *                         | *                          | ZNF562             | *                         |                            |
| MED24                  |                           |                            | ZNF805             | *                         | *                          |
| MFAP4                  | *                         |                            | ZNF830             | *                         | *                          |
| MID2                   | *                         | *                          | ZNF865             | *                         | *                          |
| <b>down regulation</b> |                           |                            |                    |                           |                            |
| <b>gene symbol</b>     | <b>Sp1<br/>(M00196_0)</b> | <b>E2F3<br/>(M02089_1)</b> | <b>gene symbol</b> | <b>Sp1<br/>(M00196_0)</b> | <b>E2F3<br/>(M02089_1)</b> |
| ACCS                   |                           | *                          | LY6K               | *                         | *                          |
| ACOT6                  |                           |                            | LZTFL1             | *                         | *                          |
| ADAMTS17               | *                         | *                          | MAFB               | *                         | *                          |
| ADGRB2                 | *                         | *                          | MEIS3P1            |                           |                            |
| AMZ2P1                 | *                         | *                          | METTL8             | *                         | *                          |
| ARID2                  | *                         | *                          | MFSD4              | *                         | *                          |
| ARL4C                  | *                         | *                          | MGARP              | *                         | *                          |
| ARMCX5                 |                           |                            | MIR29C             |                           |                            |
| ASIC1                  | *                         | *                          | MIR4665            | *                         | *                          |
| ATP2A1                 | *                         | *                          | MUC2               |                           |                            |
| ATP7A                  | *                         | *                          | NAPRT              | *                         | *                          |
| ATXN2L                 | *                         | *                          | NEBL               | *                         | *                          |
| BBS7                   | *                         | *                          | NEDD1              | *                         | *                          |
| BRAF                   | *                         | *                          | NEIL2              | *                         |                            |
| BTN3A3                 |                           |                            | NID2               | *                         | *                          |
| BUB1B                  |                           |                            | NPDC1              | *                         | *                          |
| C11orf49               | *                         | *                          | NPIPB11            |                           |                            |
| C12orf4                | *                         |                            | NRDE2              | *                         | *                          |
| C12orf65               | *                         |                            | NSFL1C             | *                         | *                          |
| C15orf52               | *                         |                            | NT5C2              | *                         | *                          |
| C18orf42               | *                         | *                          | NUP35              |                           |                            |
| C21orf33               | *                         | *                          | OCA2               | *                         | *                          |

|               |   |   |           |   |   |
|---------------|---|---|-----------|---|---|
| CA9           | * | * | OCLM      |   |   |
| CAPS          |   |   | OR7E2P    |   |   |
| CBY3          |   |   | PACS1     | * | * |
| CCDC59        | * | * | PATL1     | * |   |
| CCHCR1        | * | * | PCBD2     | * | * |
| CCNG2         | * | * | PCNXL2    |   | * |
| CDCA7         | * | * | PCSK1     |   | * |
| CDH3          | * | * | PEMT      | * | * |
| CETN4P        |   |   | PEX19     | * |   |
| CFAP69        | * | * | PHF12     | * | * |
| CHRM3         | * | * | PIK3IP1   |   |   |
| CLIC2         |   |   | PLAGL1    | * | * |
| CNTNAP4       |   |   | PLCH2     | * | * |
| COL17A1       |   |   | PLCL2     | * | * |
| COL4A5        | * |   | PLEKHB2   | * | * |
| CTD-2297D10.2 |   |   | PLEKHM2   | * | * |
| DLL3          | * | * | PLS3-AS1  | * | * |
| DOK7          | * | * | PPP1R12C  | * | * |
| DTD1          | * | * | PSMB8-AS1 | * |   |
| DVL1          | * | * | PSMD7     | * | * |
| EFHC1         | * | * | PTCD1     | * | * |
| ENTPD1        |   |   | PTPN23    | * | * |
| ENTPD1-AS1    | * | * | RAET1E    |   | * |
| EXOSC5        |   |   | RERGL     |   |   |
| F13A1         | * |   | RMDN3     | * | * |
| FAM228B       | * | * | RNF146    | * | * |
| FAM3A         | * | * | RNU4ATAC  | * | * |
| FAM76A        | * | * | RPL23AP64 |   |   |
| FLJ10038      |   | * | RPS6KL1   | * | * |
| FOXL2         | * | * | RPUSD1    | * | * |
| FPGT          | * |   | RRAGB     | * | * |
| FSCN1         | * | * | RTP3      | * | * |



|           |   |   |             |   |   |
|-----------|---|---|-------------|---|---|
| GABRE     | * | * | SAMD11      | * | * |
| GALM      |   |   | SCAMP5      | * | * |
| GATA6     | * | * | SERPINA12   |   |   |
| GATSL2    | * | * | SETD4       | * | * |
| GEN1      | * | * | SGSM3       | * | * |
| GLUD1P3   |   |   | SLC17A5     | * | * |
| GPR108    | * | * | SLC30A3     | * | * |
| GPRC5A    | * | * | SLC35G3     | * | * |
| GRASP     | * | * | SLC44A2     | * | * |
| GRIP1     | * | * | SLC5A12     | * |   |
| HDDC2     | * |   | SLFN12      |   |   |
| HEBP1     | * | * | SLX4        | * | * |
| HERC5     | * | * | SMARCA4     | * | * |
| HPSE      | * | * | SMC2        | * | * |
| ID2       | * | * | SNORA66     |   |   |
| IFT52     | * | * | SNORD116-24 |   |   |
| IGSF9     | * | * | SNORD52     | * | * |
| IL11      | * | * | SNORD76     |   |   |
| ING4      | * |   | STARD4-AS1  | * |   |
| INMT      | * |   | STARD8      |   | * |
| ITGAE     | * | * | STK17B      | * | * |
| JAKMIP3   |   |   | TAF1A-AS1   |   |   |
| KCNJ5     | * | * | TBKBP1      | * | * |
| KIAA1549  | * | * | TCF7L1      | * | * |
| KIFC3     |   |   | TCIRG1      | * | * |
| LAMA3     | * |   | TIRAP       | * | * |
| LDLRAD2   |   |   | TMEM132A    | * | * |
| LIN54     | * | * | TMEM200A    | * | * |
| LINC00176 |   |   | TMEM223     | * |   |
| LINC00319 | * |   | TPPP        | * | * |
| LINC00470 |   |   | TRIM36      | * | * |
| LINC00593 |   |   | TSC2        | * | * |

|              |   |   |         |   |   |
|--------------|---|---|---------|---|---|
| LINC00598    | * |   | TSPAN15 |   |   |
| LINC00702    |   |   | TTC3P1  |   |   |
| LINC00705    |   |   | TTN     |   |   |
| LINC00899    |   |   | UPK1B   | * | * |
| LINC00908    |   |   | UTS2B   | * |   |
| LINC01002    |   |   | VCPKMT  | * | * |
| LINC01125    |   |   | VPS11   | * |   |
| LINC01564    |   |   | ZBTB16  | * | * |
| LOC100129148 |   |   | ZBTB22  | * | * |
| LOC101928068 |   |   | ZBTB34  | * | * |
| LOC101928140 |   |   | ZFP36L1 | * | * |
| LOC101929295 |   |   | ZFP69   | * |   |
| LOC339874    | * | * | ZFP90   | * | * |
| LOC399815    |   |   | ZMYND8  | * |   |
| LOC401127    |   |   | ZNF137P |   |   |
| LOC729737    |   |   | ZNF407  | * | * |
| LRRC8D       | * | * | ZNF594  | * |   |
| LSMEM2       | * | * | ZNF841  | * | * |

Abbreviation up: the expression level of genes in PXB cells treated with AGI7 and AGI14 is commonly upregulated as compared that in PXB cell, asterisk denoted the genes recognized promoter region of E2F or Sp1.

Supplementary table 3. List of sequence of siRNA

|                          |
|--------------------------|
| siRNA for Sp1            |
| hSp1 #1                  |
| 5'-GCXCAAACGUACACACACAtt |
| 5'-UGUGUGUGUACGUUUGUGCtt |
| hSp2 #2                  |
| 5'-CCUCUUUGAAGGUGGGAAAtt |
| 5'-UUUCCCACCUUCAAGAGGtt  |
| hSp1 #3                  |
| 5'-CAGAAGAGACUGAUCCAAAtt |
| 5'-UUUGGAUCAGUCUCUUCUGtt |
| siRNA for E2F3           |
| hE2F3 #1                 |
| 5'-GGGCAAAGGAAGAGCUGCAtt |
| 5'-UGCAGCUCUCCUUUGCCctt  |
| hE2F3 #2                 |
| 5'-GAACAAGGCAGCAGAAGUGtt |
| 5'-CACUUCUGCUGCCUUGUUCtt |
| hE2F3 #3                 |
| 5'-CCAAUGUGUUUGUGAGUUUtt |
| 5'-AAACUCACAAACACAUUGGtt |

A

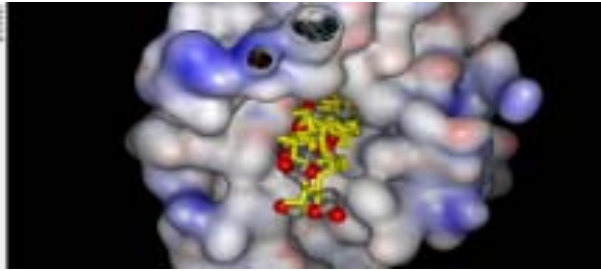

AGI1

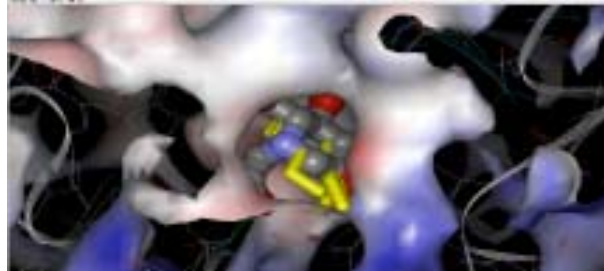

AGI2

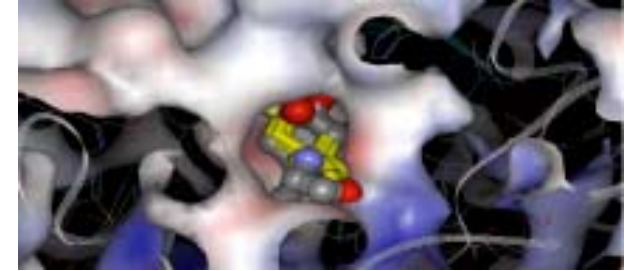

AGI3

B

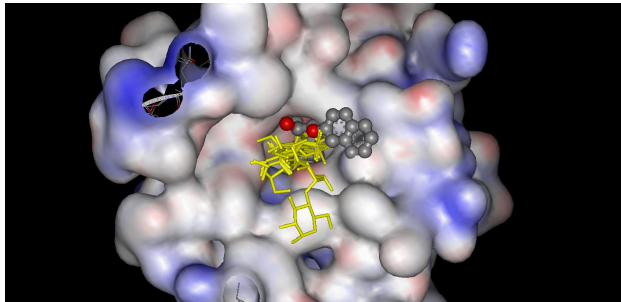

AGI5

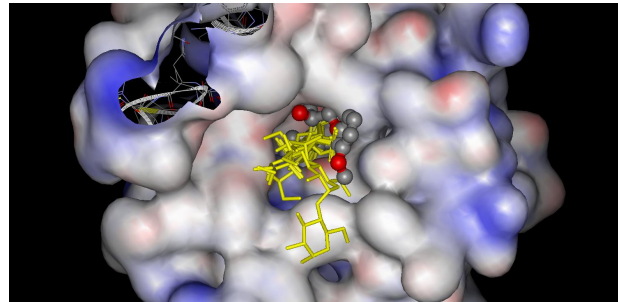

AGI6

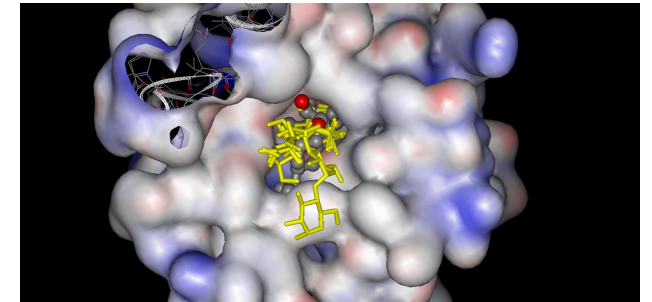

AGI7

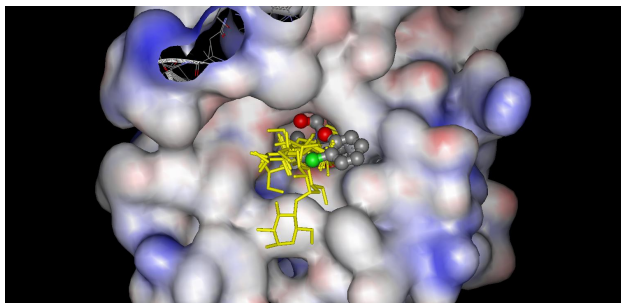

AGI13

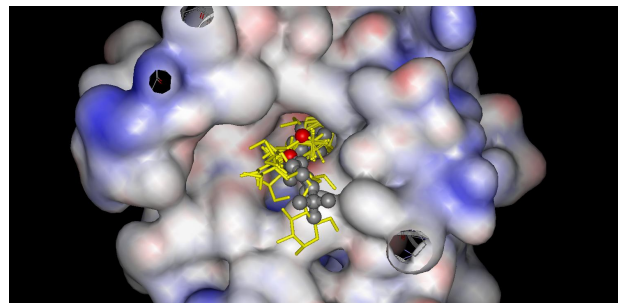

AGI14

A

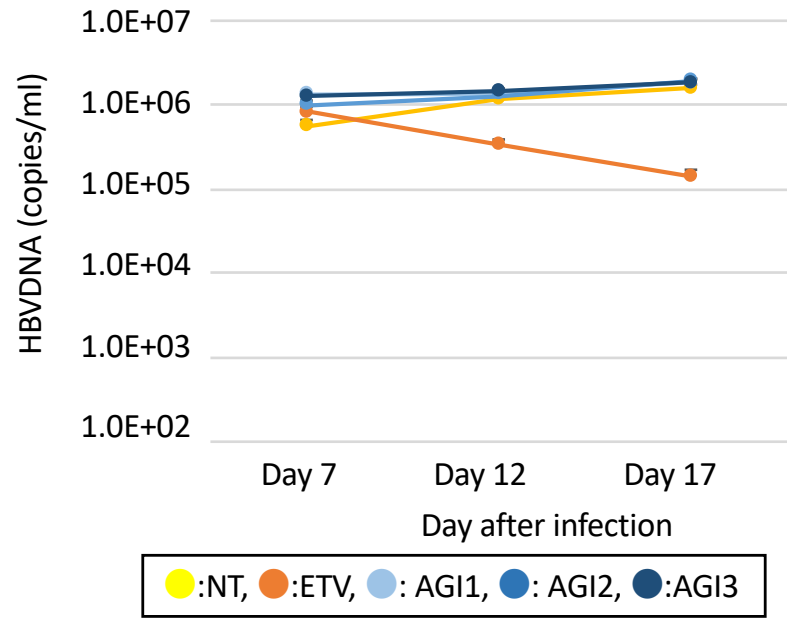

B

| Cell toxicity | d7 | d12 | d17 |
|---------------|----|-----|-----|
| <b>AGI1</b>   | ○  | ○   | ○   |
| <b>AGI2</b>   | ○  | ○   | ○   |
| <b>AGI3</b>   | ○  | ○   | ○   |

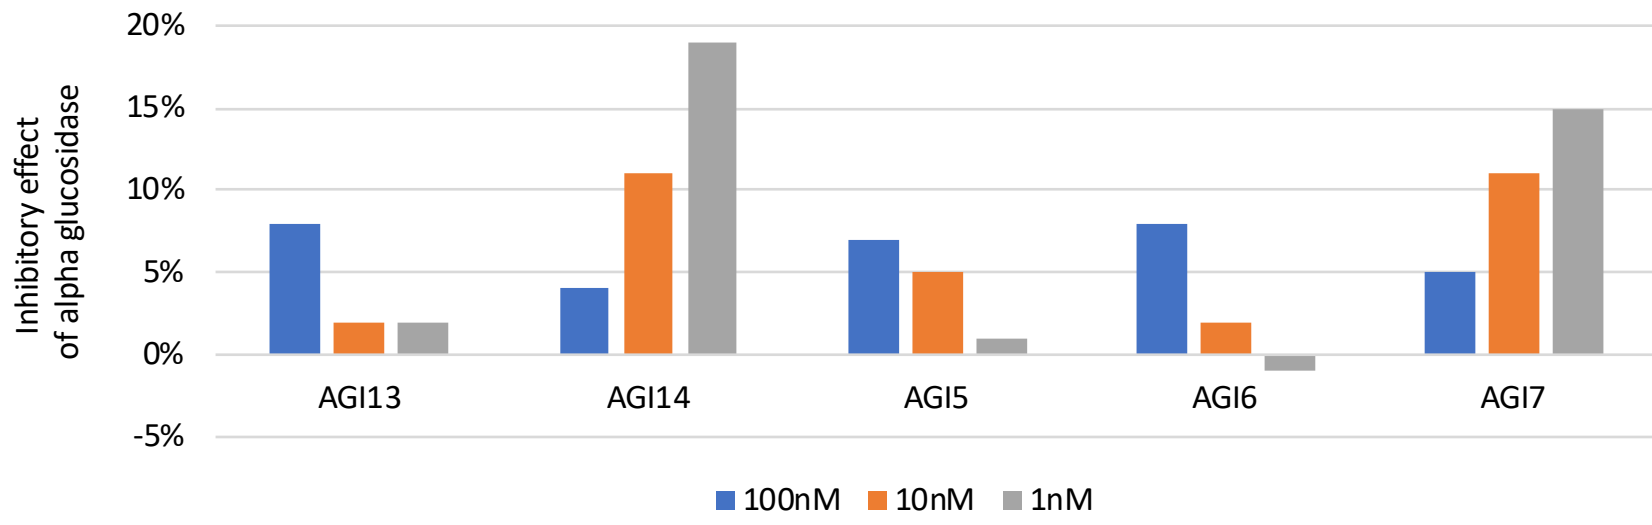

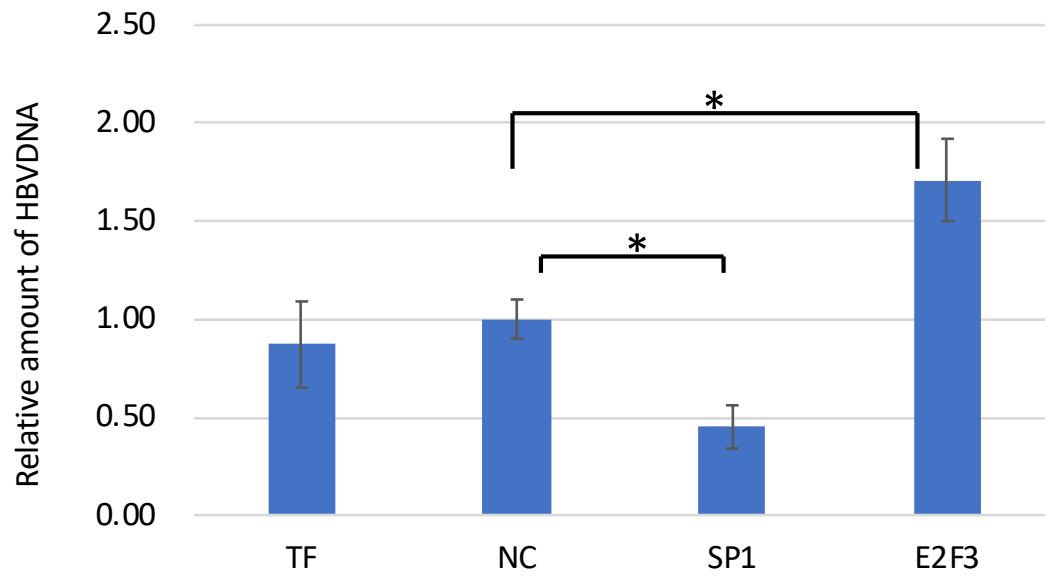

\*:  $p < 0.05$
